# Supplementary material for: Orthopteran Diversity in Steep Slope Vineyards: The Role of Vineyard Type and Vegetation Management
Source: MDPI journal article supplement (doi:10.3390/insects14010083), 2023-01-13
Supplement: s1 [file s1]

## Supplementary material S1

**Table S1:** Abundances of all sampled Orthoptera sorted by family for vineyard types and compartments of vertically oriented vineyards, compartments of terraced vineyards, and canopy. Individuals that were captured in the canopy were not included in the analysis. The status of conservation concern is given according to the Red List for Orthoptera in Germany (Maas et al 2011), with endangered species highlighted in gray. The bold improves the readability of the table.

| Vertically oriented                 |         |               |          |        |       | Terrace    |           |        | Fallow |       |                     |   |
|-------------------------------------|---------|---------------|----------|--------|-------|------------|-----------|--------|--------|-------|---------------------|---|
| Species                             | Code    | Vegetated row | Open row | Canopy | Total | Embankment | Inter-Row | Canopy | Total  | Total | Status <sup>1</sup> |   |
| Gomphocerinae                       |         |               |          |        |       |            |           |        |        |       |                     |   |
| <i>Chorthippus biguttulus</i>       | Cho.big | 58            | 29       | 0      | 87    | 10         | 15        | 0      | 25     | 0     | 112                 |   |
| <i>Chorthippus brunneus</i>         | Cho.bru | 6             | 5        | 0      | 11    | 1          | 6         | 0      | 7      | 0     | 18                  |   |
| <i>Chorthippus dorsatus</i>         | Cho.dor | 0             | 0        | 0      | 0     | 1          | 0         | 0      | 1      | 0     | 1                   |   |
| <i>Chorthippus vagans</i>           | Cho.vag | 2             | 2        | 0      | 4     | 3          | 0         | 0      | 3      | 0     | 7                   | 3 |
| <i>Pseudochorthippus parallelus</i> | Pse.par | 1             | 0        | 0      | 1     | 0          | 0         | 0      | 0      | 0     | 1                   |   |
| Gryllidae                           |         |               |          |        |       |            |           |        |        |       |                     |   |
| <i>Nemobius sylvestris</i>          | Nem.syl | 0             | 0        | 0      | 0     | 1          | 0         | 0      | 1      | 0     | 1                   |   |
| Meconematinae                       |         |               |          |        |       |            |           |        |        |       |                     |   |
| <i>Meconema meridionale</i>         | Mec.mer | 0             | 0        | 0      | 0     | 1          | 0         | 0      | 1      | 1     | 3                   |   |
| Oecanthinae                         |         |               |          |        |       |            |           |        |        |       |                     |   |
| <i>Oecanthus pellucens</i>          | Oec.pel | 0             | 1        | 1      | 2     | 13         | 6         | 0      | 19     | 3     | 24                  |   |
| Oedipodinae                         |         |               |          |        |       |            |           |        |        |       |                     |   |
| <i>Oedipoda caerulescens</i>        | Oed.cae | 1             | 13       | 0      | 14    | 3          | 15        | 1      | 19     | 0     | 32                  | V |
| <i>Oedipoda germanica</i>           | Oed.ger | 2             | 1        | 0      | 3     | 0          | 0         | 0      | 0      | 0     | 3                   | 1 |
| Phaneropterinae                     |         |               |          |        |       |            |           |        |        |       |                     |   |
| <i>Phaneroptera falcata</i>         | Pha.fal | 0             | 0        | 0      | 0     | 3          | 2         | 0      | 5      | 0     | 5                   |   |
| <i>Phaneroptera nana</i>            | Pha.nan | 0             | 0        | 0      | 0     | 0          | 0         | 0      | 0      | 1     | 2                   |   |
| Tettigoniinae                       |         |               |          |        |       |            |           |        |        |       |                     |   |
| <i>Leptophyes punctatissima</i>     | Lep.pun | 0             | 0        | 1      | 1     | 0          | 0         | 0      | 0      | 1     | 2                   |   |
| <i>Pholidoptera griseoaptera</i>    | Pho.gri | 0             | 0        | 0      | 0     | 1          | 0         | 0      | 1      | 0     | 1                   |   |
| <i>Platycleis albopunctata</i>      | Pla.alb | 4             | 4        | 0      | 8     | 14         | 1         | 0      | 15     | 0     | 23                  |   |
| Total                               |         | 74            | 55       | 2      | 131   | 51         | 45        | 1      | 97     | 6     | 234                 |   |

<sup>1</sup> Status of conservation concern with V – near threatened, 3 – endangered, 1 – threatened with extinction
