# Supplementary material for: Orthopteran Diversity in Steep Slope Vineyards: The Role of Vineyard Type and Vegetation Management
Source: MDPI journal article supplement (doi:10.3390/insects14010083), 2023-01-13
Supplement: s1 [file s1]

## Supplementary material S2 – S5

**Table S2:** Effects of local vineyard and landscape parameters on Caelifera and Ensifera species richness and density, and density of the two most abundant species *Chorthippus biguttulus* and *Oedipoda caerulescens* analysed using vineyard types. The presented estimates and p-values are obtained from the single models  $Y \sim \text{Intercept} + \text{Predictor}$  with 'vineyard triplet' as random factor.  $R^2$  marginal gives explained variation without and  $R^2$  conditional with the random factor. Significant predictors ( $p < 0.05$ ) are printed in bold; SNH: semi-natural habitat.

| Dependent variable         | Predictor                     | Estimate $\pm$ SE                  | p-Value       | $R^2_{\text{marg}}$ | $R^2_{\text{cond}}$ | AICc         |
|----------------------------|-------------------------------|------------------------------------|---------------|---------------------|---------------------|--------------|
| Caelifera species richness | SNH (%)                       | 0.01 $\pm$ 0.14                    | 0.7890        | 0.01                | 0.01                | 140.0        |
|                            | Vineyard (%)                  | -0.18 $\pm$ 0.14                   | 0.1900        | 0.03                | 0.03                | 138.9        |
|                            | Forest (%)                    | 0.14 $\pm$ 0.14                    | 0.3310        | 0.02                | 0.02                | 139.7        |
|                            | SNH distance (m)              | 0.11 $\pm$ 0.14                    | 0.4180        | 0.01                | 0.00                | 140.0        |
|                            | Forest distance (m)           | -0.19 $\pm$ 0.16                   | 0.2350        | 0.03                | 0.00                | 139.1        |
|                            | <b>Vegetation height (cm)</b> | <b>-1.15 <math>\pm</math> 0.32</b> | <b>0.0003</b> | <b>0.66</b>         | <b>0.66</b>         | <b>116.2</b> |
|                            | <b>Bare ground cover (%)</b>  | <b>0.38 <math>\pm</math> 0.12</b>  | <b>0.0016</b> | <b>0.14</b>         | <b>0.14</b>         | <b>131.5</b> |
|                            | Vegetation cover (%)          | 0.19 $\pm$ 0.12                    | 0.1320        | 0.03                | 0.03                | 138.5        |
|                            | <b>Shrub cover (%)</b>        | <b>-1.21 <math>\pm</math> 0.32</b> | <b>0.0002</b> | <b>0.70</b>         | <b>0.70</b>         | <b>112.3</b> |
|                            | Litter cover (%)              | 0.06 $\pm$ 0.14                    | 0.6766        | 0.01                | 0.01                | 140.4        |
|                            |                               |                                    |               |                     |                     |              |
|                            |                               |                                    |               |                     |                     |              |
| Caelifera density          | SNH (%)                       | 0.04 $\pm$ 0.05                    | 0.3750        | 0.02                | 0.02                | 33.9         |
|                            | Vineyard (%)                  | -0.01 $\pm$ 0.05                   | 0.9710        | 0.01                | 0.01                | 34.7         |
|                            | Forest (%)                    | 0.01 $\pm$ 0.05                    | 0.9610        | 0.01                | 0.01                | 34.7         |
|                            | SNH distance (m)              | 0.03 $\pm$ 0.05                    | 0.4910        | 0.01                | 0.00                | 34.2         |
|                            | Forest distance (m)           | -0.03 $\pm$ 0.05                   | 0.5810        | 0.01                | 0.00                | 34.4         |
|                            | <b>Vegetation height (cm)</b> | <b>-0.14 <math>\pm</math> 0.05</b> | <b>0.0051</b> | <b>0.16</b>         | <b>0.22</b>         | <b>27.7</b>  |
|                            | Bare ground cover (%)         | 0.11 $\pm$ 0.05                    | <b>0.0352</b> | 0.11                | 0.11                | 30.5         |
|                            | <b>Vegetation cover (%)</b>   | <b>0.11 <math>\pm</math> 0.05</b>  | <b>0.0245</b> | <b>0.10</b>         | <b>0.10</b>         | <b>29.9</b>  |
|                            | <b>Shrub cover (%)</b>        | <b>-0.14 <math>\pm</math> 0.04</b> | <b>0.0013</b> | <b>0.19</b>         | <b>0.21</b>         | <b>25.3</b>  |
|                            | Litter cover (%)              | -0.02 $\pm$ 0.05                   | 0.7490        | 0.01                | 0.01                | 34.6         |
|                            |                               |                                    |               |                     |                     |              |
|                            |                               |                                    |               |                     |                     |              |
| Ensifera species richness  | SNH (%)                       | -0.13 $\pm$ 0.16                   | 0.1020        | 0.08                | 0.08                | 117.5        |
|                            | Vineyard (%)                  | 0.31 $\pm$ 0.16                    | 0.0543        | 0.11                | 0.11                | 116.5        |
|                            | Forest (%)                    | 0.01 $\pm$ 0.17                    | 0.9590        | 0.01                | 0.08                | 120.1        |
|                            | <b>SNH distance (m)</b>       | <b>0.42 <math>\pm</math> 0.14</b>  | <b>0.0040</b> | <b>0.18</b>         | <b>0.24</b>         | <b>113.8</b> |
|                            | Forest distance (m)           | -0.09 $\pm$ 0.18                   | 0.6260        | 0.01                | 0.05                | 121.8        |
|                            | <b>Vegetation height (cm)</b> | <b>-0.54 <math>\pm</math> 0.26</b> | <b>0.0352</b> | <b>0.26</b>         | <b>0.33</b>         | <b>113.8</b> |
|                            | Bare ground cover (%)         | 0.22 $\pm$ 0.17                    | 0.2100        | 0.05                | 0.20                | 118.5        |
|                            | Vegetation cover (%)          | 0.17 $\pm$ 0.15                    | 0.2530        | 0.04                | 0.05                | 1118.9       |
|                            | <b>Shrub cover (%)</b>        | <b>-0.51 <math>\pm</math> 0.23</b> | <b>0.0340</b> | <b>0.24</b>         | <b>0.27</b>         | <b>114.1</b> |
|                            | Litter cover (%)              | 0.10 $\pm$ 0.16                    | 0.5240        | 0.01                | 0.08                | 119.7        |
|                            |                               |                                    |               |                     |                     |              |
|                            |                               |                                    |               |                     |                     |              |
| Ensifera density           | <b>SNH (%)</b>                | <b>-0.04 <math>\pm</math> 0.02</b> | <b>0.0304</b> | <b>0.10</b>         | <b>0.10</b>         | <b>-45.9</b> |
|                            | <b>Vineyard (%)</b>           | <b>0.05 <math>\pm</math> 0.02</b>  | <b>0.0112</b> | <b>0.13</b>         | <b>0.13</b>         | <b>-47.5</b> |
|                            | Forest (%)                    | -0.02 $\pm$ 0.02                   | 0.3970        | 0.02                | 0.02                | -42.2        |
|                            | <b>SNH distance (m)</b>       | <b>0.06 <math>\pm</math> 0.02</b>  | <b>0.0029</b> | <b>0.17</b>         | <b>0.00</b>         | <b>-49.5</b> |
|                            | Forest distance (m)           | 0.01 $\pm$ 0.02                    | 0.5510        | 0.01                | 0.01                | -41.8        |
|                            |                               |                                    |               |                     |                     |              |
|                            | Vegetation height (cm)        | -0.02 $\pm$ 0.02                   | 0.3810        | 0.02                | 0.02                | -42.2        |
|                            | Bare ground cover (%)         | -0.02 $\pm$ 0.02                   | 0.4090        | 0.02                | 0.02                | -42.1        |

|                                |                               |                     |                   |             |             |              |
|--------------------------------|-------------------------------|---------------------|-------------------|-------------|-------------|--------------|
| <i>C. biguttulus</i> density   | Vegetation cover (%)          | 0.01 ± 0.02         | 0.7080            | 0.01        | 0.01        | -41.6        |
|                                | Shrub cover (%)               | -0.01 ± 0.02        | 0.8460            | 0.01        | 0.01        | -41.5        |
|                                | Litter cover (%)              | 0.02 ± 0.02         | 0.3730            | 0.02        | 0.02        | -42.2        |
|                                | SNH (%)                       | -0.01 ± 0.04        | 0.8194            | 0.01        | 0.00        | 18.8         |
|                                | Vineyard (%)                  | 0.05 ± 0.04         | 0.2624            | 0.03        | 0.00        | 17.7         |
|                                | Forest (%)                    | -0.02 ± 0.04        | 0.6048            | 0.01        | 0.00        | 18.6         |
|                                | SNH distance (m)              | 0.05 ± 0.04         | 0.2387            | 0.03        | 0.00        | 17.5         |
|                                | Forest distance (m)           | 0.02 ± 0.04         | 0.7877            | 0.01        | 0.00        | 18.6         |
|                                | <b>Vegetation height (cm)</b> | <b>-0.08 ± 0.04</b> | <b>0.0393</b>     | <b>0.09</b> | <b>0.00</b> | <b>14.8</b>  |
|                                | Bare ground cover (%)         | 0.03 ± 0.04         | 0.4824            | 0.01        | 0.00        | 18.4         |
|                                | <b>Vegetation cover (%)</b>   | <b>0.09 ± 0.04</b>  | <b>0.0192</b>     | <b>0.11</b> | <b>0.00</b> | <b>13.7</b>  |
|                                | Shrub cover (%)               | -0.01 ± 0.02        | 0.8460            | 0.01        | 0.01        | 41.5         |
|                                | Litter cover (%)              | 0.01 ± 0.04         | 0.8140            | 0.01        | 0.00        | 18.8         |
|                                | <b>SNH (%)</b>                | <b>-0.03 ± 0.01</b> | <b>0.0220</b>     | <b>0.11</b> | <b>0.00</b> | <b>-83.2</b> |
|                                | Vineyard (%)                  | 0.02 ± 0.01         | 0.1189            | 0.05        | 0.00        | -80.6        |
|                                | Forest (%)                    | -0.01 ± 0.01        | 0.9068            | 0.00        | 0.00        | -78.3        |
|                                | SNH distance (m)              | -0.01 ± 0.02        | 0.7040            | 0.01        | 0.00        | -78.4        |
|                                | Forest distance (m)           | -0.02 ± 0.02        | 0.1984            | 0.04        | 0.00        | -79.9        |
|                                | Vegetation height (cm)        | -0.02 ± 0.01        | 0.1590            | 0.04        | 0.00        | -80.2        |
| <i>O. caerulescens</i> density | Bare ground cover (%)         | 0.05 ± 0.02         | <b>&lt;0.0001</b> | 0.31        | 0.00        | -94.3        |
|                                | Vegetation cover (%)          | 0.01 ± 0.01         | 0.7396            | 0.01        | 0.00        | -78.3        |
|                                | <b>Shrub cover (%)</b>        | <b>-0.03 ± 0.01</b> | <b>0.0328</b>     | <b>0.09</b> | <b>0.00</b> | <b>-82.6</b> |
|                                | Litter cover (%)              | -0.03 ± 0.01        | 0.0591            | 0.08        | 0.00        | -81.7        |

**Table S3:** Effects of local vineyard and landscape parameters on Orthoptera, Caelifera and Ensifera species richness and density, and density of the two most abundant species *Chorthippus biguttulus* and *Oedipoda caerulescens* analysed using vineyard compartments. The presented estimates and p-values are obtained from the single models  $Y \sim \text{Intercept} + \text{Predictor}$  with ‘vineyard row’ as random factor.  $R^2$  marginal gives explained variation without and  $R^2$  conditional with the random factor. Significant predictors ( $p < 0.05$ ) are printed in bold; SNH: semi-natural habitat.

| Dependent variable          | Predictor                     | Estimate ± SE       | p-Value       | $R^2_{\text{marg}}$ | $R^2_{\text{cond}}$ | AICc         |
|-----------------------------|-------------------------------|---------------------|---------------|---------------------|---------------------|--------------|
| Orthoptera species richness | SNH (%)                       | 0.11 ± 0.09         | 0.1830        | 0.02                | 0.07                | 186.5        |
|                             | Vineyard (%)                  | -0.07 ± 0.09        | 0.4300        | 0.01                | 0.07                | 187.7        |
|                             | Forest (%)                    | 0.12 ± 0.08         | 0.1260        | 0.02                | 0.07                | 186.1        |
|                             | SNH distance (m)              | 0.07 ± 0.08         | 0.3730        | 0.01                | 0.07                | 187.5        |
|                             | Forest distance (m)           | -0.14 ± 0.09        | 0.1160        | 0.04                | 0.07                | 185.7        |
|                             | <b>Vegetation height (cm)</b> | <b>0.18 ± 0.06</b>  | <b>0.0048</b> | <b>0.06</b>         | <b>0.10</b>         | <b>181.4</b> |
|                             | <b>Bare ground cover (%)</b>  | <b>-0.21 ± 0.08</b> | <b>0.0158</b> | <b>0.07</b>         | <b>0.19</b>         | <b>182.6</b> |
|                             | Vegetation cover (%)          | 0.06 ± 0.08         | 0.4420        | 0.01                | 0.01                | 187.7        |
|                             | Shrub cover (%)               | 0.07 ± 0.07         | 0.3290        | 0.01                | 0.09                | 187.4        |
|                             | Litter cover (%)              | 0.16 ± 0.08         | 0.0567        | 0.04                | 0.17                | 184.77       |
|                             | SNH (%)                       | 0.05 ± 0.06         | 0.4010        | 0.01                | 0.11                | 88.3         |
|                             | Vineyard (%)                  | 0.04 ± 0.06         | 0.5370        | 0.01                | 0.11                | 88.6         |
|                             | Forest (%)                    | 0.06 ± 0.06         | 0.3620        | 0.02                | 0.11                | 88.2         |
| Orthoptera density          | SNH distance (m)              | 0.03 ± 0.07         | 0.6420        | 0.01                | 0.11                | 88.8         |
|                             | Forest distance (m)           | -0.04 ± 0.07        | 0.5780        | 0.01                | 0.11                | 88.7         |

|                            |                               |                     |                   |             |             |              |
|----------------------------|-------------------------------|---------------------|-------------------|-------------|-------------|--------------|
|                            | Vegetation height (cm)        | 0.11 ± 0.06         | 0.0710            | 0.05        | 0.17        | 85.8         |
|                            | <b>Bare ground cover (%)</b>  | <b>-0.12 ± 0.06</b> | <b>0.0477</b>     | <b>0.06</b> | <b>0.23</b> | <b>85.3</b>  |
|                            | <b>Vegetation cover (%)</b>   | <b>0.15 ± 0.06</b>  | <b>0.0161</b>     | <b>0.09</b> | <b>0.16</b> | <b>83.5</b>  |
|                            | Shrub cover (%)               | 0.02 ± 0.06         | 0.7040            | 0.01        | 0.13        | 88.9         |
|                            | Litter cover (%)              | 0.04 ± 0.06         | 0.5700            | 0.01        | 0.15        | 88.7         |
| Caelifera species richness | <b>SNH (%)</b>                | <b>0.31 ± 0.11</b>  | <b>0.0024</b>     | <b>0.18</b> | <b>0.00</b> | <b>146.5</b> |
|                            | <b>Vineyard (%)</b>           | <b>-0.22 ± 0.09</b> | <b>0.0133</b>     | <b>0.10</b> | <b>0.00</b> | <b>150.1</b> |
|                            | <b>Forest (%)</b>             | <b>0.18 ± 0.08</b>  | <b>0.0161</b>     | <b>0.02</b> | <b>0.00</b> | <b>151.0</b> |
|                            | SNH distance (m)              | -0.13 ± 0.09        | 0.1986            | 0.03        | 0.00        | 154.2        |
|                            | Forest distance (m)           | -0.21 ± 0.11        | 0.0734            | 0.09        | 0.00        | 152.4        |
|                            | Vegetation height (cm)        | 0.05 ± 0.09         | 0.6037            | 0.01        | 0.00        | 155.7        |
|                            | Bare ground cover (%)         | -0.06 ± 0.11        | 0.5400            | 0.01        | 0.03        | 155.6        |
|                            | Vegetation cover (%)          | 0.09 ± 0.09         | 0.2650            | 0.02        | 0.03        | 154.8        |
|                            | Shrub cover (%)               | -0.01 ± 0.09        | 0.9190            | 0.00        | 0.03        | 156.0        |
|                            | Litter cover (%)              | 0.01 ± 0.09         | 0.9640            | 0.00        | 0.03        | 156.0        |
| Caelifera density          | SNH (%)                       | 0.11 ± 0.06         | 0.0762            | 0.06        | 0.16        | 77.4         |
|                            | Vineyard (%)                  | 0.01 ± 0.06         | 0.9920            | 0.00        | 0.16        | 80.4         |
|                            | Forest (%)                    | 0.05 ± 0.06         | 0.4590            | 0.01        | 0.16        | 79.8         |
|                            | SNH distance (m)              | -0.01 ± 0.06        | 0.9680            | 0.00        | 0.16        | 80.4         |
|                            | Forest distance (m)           | -0.03 ± 0.06        | 0.5780            | 0.01        | 0.16        | 80.1         |
|                            | Vegetation height (cm)        | 0.04 ± 0.06         | 0.4710            | 0.01        | 0.16        | 79.9         |
|                            | Bare ground cover (%)         | -0.03 ± 0.06        | 0.5990            | 0.01        | 0.17        | 80.1         |
|                            | <b>Vegetation cover (%)</b>   | <b>0.12 ± 0.06</b>  | <b>0.0446</b>     | <b>0.07</b> | <b>0.16</b> | <b>76.6</b>  |
|                            | Shrub cover (%)               | 0.01 ± 0.06         | 0.9910            | 0.00        | 0.16        | 80.4         |
|                            | Litter cover (%)              | -0.04 ± 0.06        | 0.5050            | 0.01        | 0.15        | 79.9         |
| Ensifera species richness  | SNH (%)                       | -0.21 ± 0.18        | 0.2390            | 0.04        | 0.12        | 127.2        |
|                            | Vineyard (%)                  | 0.25 ± 0.18         | 0.1565            | 0.06        | 0.12        | 126.2        |
|                            | Forest (%)                    | -0.05 ± 0.19        | 0.8012            | 0.01        | 0.12        | 128.5        |
|                            | <b>SNH distance (m)</b>       | <b>0.41 ± 0.15</b>  | <b>0.0043</b>     | <b>0.19</b> | <b>0.00</b> | <b>123.4</b> |
|                            | Forest distance (m)           | -0.06 ± 0.19        | 0.7527            | 0.01        | 0.26        | 130.1        |
|                            | <b>Vegetation height (cm)</b> | <b>0.41 ± 0.13</b>  | <b>0.0021</b>     | <b>0.13</b> | <b>0.20</b> | <b>119.9</b> |
|                            | <b>Bare ground cover (%)</b>  | <b>-0.47 ± 0.20</b> | <b>0.0198</b>     | <b>0.16</b> | <b>0.26</b> | <b>122.4</b> |
|                            | Vegetation cover (%)          | -0.02 ± 0.18        | 0.8931            | 0.01        | 0.12        | 128.5        |
|                            | Shrub cover (%)               | 0.17 ± 0.13         | 0.1888            | 0.03        | 0.14        | 127.1        |
|                            | <b>Litter cover (%)</b>       | <b>0.42 ± 0.18</b>  | <b>0.0219</b>     | <b>0.13</b> | <b>0.27</b> | <b>122.8</b> |
| Ensifera density           | SNH (%)                       | -0.03 ± 0.02        | 0.1670            | 0.04        | 0.22        | -40.6        |
|                            | Vineyard (%)                  | 0.03 ± 0.02         | 0.2090            | 0.03        | 0.22        | -40.3        |
|                            | Forest (%)                    | -0.01 ± 0.02        | 0.8730            | 0.01        | 0.21        | -38.8        |
|                            | <b>SNH distance (m)</b>       | <b>0.06 ± 0.02</b>  | <b>0.0088</b>     | <b>0.12</b> | <b>0.22</b> | <b>-44.9</b> |
|                            | Forest distance (m)           | 0.01 ± 0.03         | 0.5550            | 0.01        | 0.21        | -39.1        |
|                            | <b>Vegetation height (cm)</b> | <b>0.08 ± 0.02</b>  | <b>&lt;0.0001</b> | <b>0.24</b> | <b>0.60</b> | <b>-57.4</b> |
|                            | <b>Bare ground cover (%)</b>  | <b>-0.06 ± 0.02</b> | <b>0.0035</b>     | <b>0.11</b> | <b>0.39</b> | <b>-46.4</b> |
|                            | Vegetation cover (%)          | -0.01 ± 0.02        | 0.7430            | 0.01        | 0.22        | -38.8        |

|                                |                              |                     |               |             |             |              |
|--------------------------------|------------------------------|---------------------|---------------|-------------|-------------|--------------|
|                                | Shrub cover (%)              | 0.03 ± 0.02         | 0.1250        | 0.04        | 0.30        | -41.0        |
|                                | <b>Litter cover (%)</b>      | <b>0.06 ± 0.02</b>  | <b>0.0018</b> | <b>0.13</b> | <b>0.42</b> | <b>-47.5</b> |
| <i>C. biguttulus</i> density   | SNH (%)                      | 0.02 ± 0.06         | 0.7270        | 0.01        | 0.23        | 63.7         |
|                                | Vineyard (%)                 | 0.07 ± 0.06         | 0.2040        | 0.03        | 0.23        | 62.2         |
|                                | Forest (%)                   | -0.01 ± 0.06        | 0.8530        | 0.01        | 0.23        | 63.8         |
|                                | SNH distance (m)             | 0.04 ± 0.06         | 0.5090        | 0.01        | 0.23        | 63.4         |
|                                | Forest distance (m)          | 0.02 ± 0.06         | 0.6890        | 0.01        | 0.23        | 63.6         |
|                                | Vegetation height (cm)       | 0.08 ± 0.05         | 0.0849        | 0.04        | 0.31        | 60.9         |
|                                | Bare ground cover (%)        | -0.08 ± 0.05        | 0.1010        | 0.04        | 0.27        | 61.2         |
|                                | <b>Vegetation cover (%)</b>  | <b>0.12 ± 0.05</b>  | <b>0.0142</b> | <b>0.11</b> | <b>0.26</b> | <b>58.1</b>  |
|                                | Shrub cover (%)              | 0.03 ± 0.05         | 0.5980        | 0.01        | 0.26        | 63.5         |
|                                | Litter cover (%)             | 0.01 ± 0.05         | 0.8460        | 0.01        | 0.24        | 63.8         |
| <i>O. caerulescens</i> density | <b>SNH (%)</b>               | <b>-0.05 ± 0.02</b> | <b>0.0122</b> | <b>0.11</b> | <b>0.00</b> | <b>-51.1</b> |
|                                | Vineyard (%)                 | -0.03 ± 0.02        | 0.1282        | 0.04        | 0.00        | -47.4        |
|                                | Forest (%)                   | 0.03 ± 0.02         | 0.1317        | 0.04        | 0.00        | -47.4        |
|                                | SNH distance (m)             | -0.02 ± 0.02        | 0.3816        | 0.01        | 0.00        | -45.9        |
|                                | Forest distance (m)          | -0.03 ± 0.02        | 0.1791        | 0.03        | 0.00        | -47.0        |
|                                | Vegetation height (cm)       | -0.02 ± 0.02        | 0.3462        | 0.02        | 0.10        | -46.1        |
|                                | <b>Bare ground cover (%)</b> | <b>0.06 ± 0.02</b>  | <b>0.0008</b> | <b>0.16</b> | <b>0.00</b> | <b>-55.4</b> |
|                                | Vegetation cover (%)         | -0.02 ± 0.02        | 0.4278        | 0.01        | 0.00        | -48.8        |
|                                | Shrub cover (%)              | -0.03 ± 0.02        | 0.2147        | 0.03        | 0.00        | -46.7        |
|                                | <b>Litter cover (%)</b>      | <b>-0.05 ± 0.02</b> | <b>0.0065</b> | <b>0.12</b> | <b>0.00</b> | <b>-52.2</b> |

**Table S4:** Correlation of environmental and landscape variables with the first two DCA components related to Orthoptera species composition in vineyard compartments. Variables that were significantly related to the DCA axes ( $p < 0.05$ , 9999 permutations) are printed in bold. Asterisks indicate significance levels ( $p < 0.05 = *$ ,  $p < 0.005 = **$ ); SNH: semi-natural habitat.

| Variable                     | DCA1           | DCA2           | Pr (>r)          |
|------------------------------|----------------|----------------|------------------|
| SNH (%)                      | 0.2768         | -0.9609        | 0.0610           |
| <b>Vineyard (%)</b>          | <b>-0.6143</b> | <b>0.9981</b>  | <b>0.0230 *</b>  |
| Forest (%)                   | -0.0978        | -0.9952        | 0.3890           |
| <b>SNH distance (m)</b>      | <b>-0.1455</b> | <b>0.8943</b>  | <b>0.0020 **</b> |
| Forest distance (m)          | 0.4476         | 0.8942         | 0.4650           |
| Vegetation height (cm)       | -0.1116        | 0.9938         | 0.2260           |
| <b>Bare ground cover (%)</b> | <b>-0.8813</b> | <b>-0.4727</b> | <b>0.0290 *</b>  |
| Vegetation cover (%)         | 0.4355         | -0.9002        | 0.4490           |
| Shrub cover (%)              | 0.4596         | 0.8879         | 0.3140           |
| <b>Litter cover (%)</b>      | <b>0.6258</b>  | <b>0.7800</b>  | <b>0.0260 *</b>  |

**Table S5:** Correlation of environmental and landscape variables with the first two PCA components related to Orthoptera species composition in vineyard types. Variables that were significantly related to the PCA axes ( $p < 0.05$ , 9999 permutations) are printed in bold. Asterisks indicate significance levels ( $p < 0.005=**$ ); SNH: semi-natural habitat.

| Variable                     | PC1            | PC2            | Pr (>r)          |
|------------------------------|----------------|----------------|------------------|
| SNH (%)                      | 0.0842         | -0.9965        | 0.1370           |
| Vineyard (%)                 | 0.4296         | 0.9030         | 0.1920           |
| Forest (%)                   | -0.9833        | -0.1823        | 0.6530           |
| SNH distance (m)             | 0.8418         | 0.5398         | 0.4540           |
| Forest distance (m)          | 0.4777         | 0.8785         | 0.2390           |
| Vegetation height (cm)       | -0.5822        | -0.8130        | 0.7890           |
| <b>Bare ground cover (%)</b> | <b>-0.1889</b> | <b>-0.9819</b> | <b>0.0060 **</b> |
| Vegetation cover (%)         | 0.9774         | 0.2113         | 0.4920           |
| Shrub cover (%)              | -0.7962        | 0.6051         | 0.0790           |
| Litter cover (%)             | 0.1444         | 0.9896         | 0.0580           |

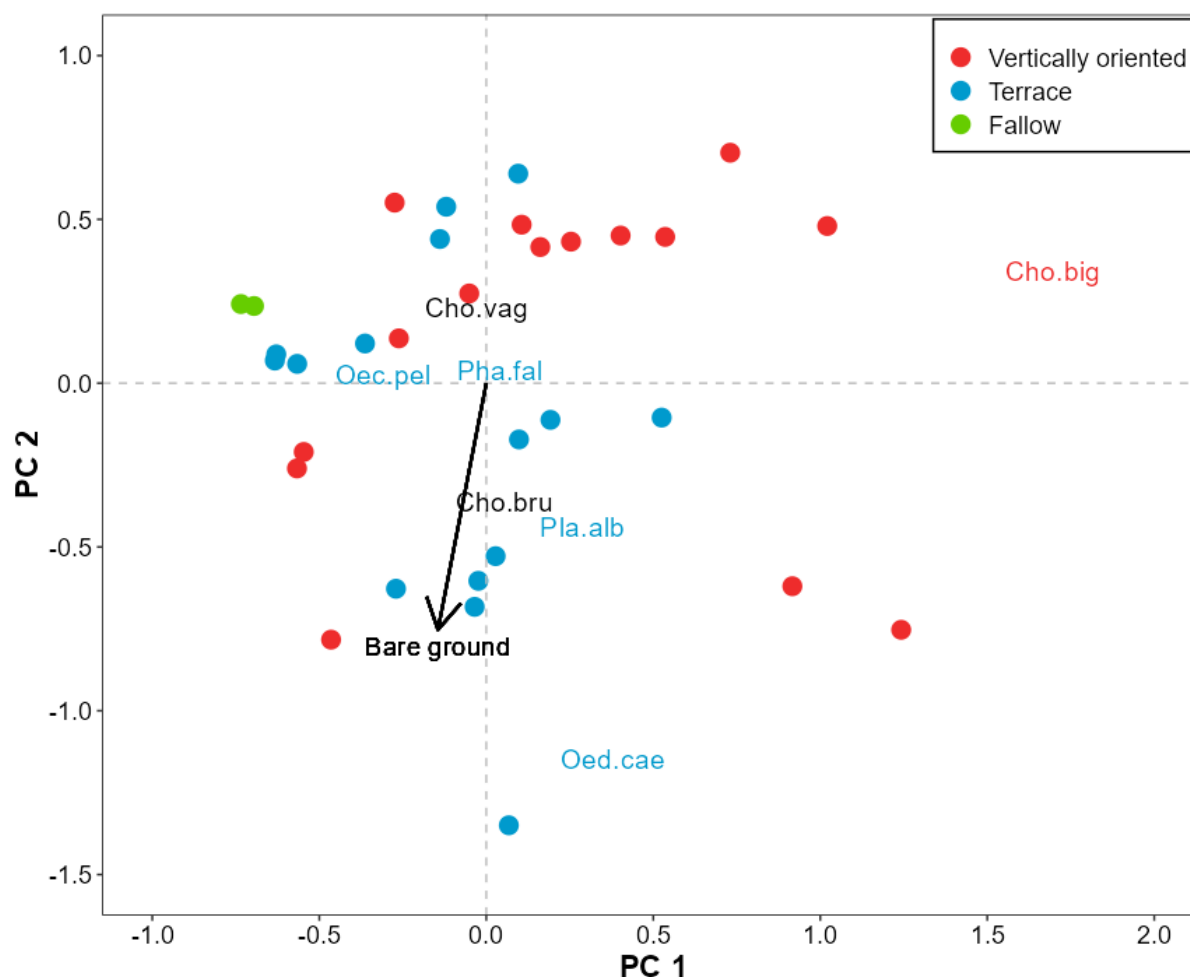

**Figure S1.** PCA results for Orthoptera species composition of vineyard types. The first component explained 38.99 % of variance, the second component 22.28 %. Dots show sample scores for vertically oriented vineyards (red), terraced vineyards (blue) and fallows (green). Environmental and landscape variables that were significantly related to the PCA axes ( $p < 0.05$ , 9999 permutations) were included post-hoc by projection. Indicator species are colored in red for vertically oriented vineyards and in blue for terraced vineyards. For black-colored species names, no assigned indicator values were available. Cho.big: *Chorthippus biguttulus*;

Cho.bru: *Chorthippus brunneus*; Cho.vag: *Chorthippus vagans*; Oec.pel: *Oecanthus pellucens*; Oed.cae: *Oedipoda caerulescens*; Pha.fal: *Phaneroptera falcata*; Pla.alb: *Platycleis albopunctata*.
