# Supplementary figures and images for: Orthopteran Diversity in Steep Slope Vineyards: The Role of Vineyard Type and Vegetation Management
Source: MDPI journal article supplement (doi:10.3390/insects14010083), 2023-01-13

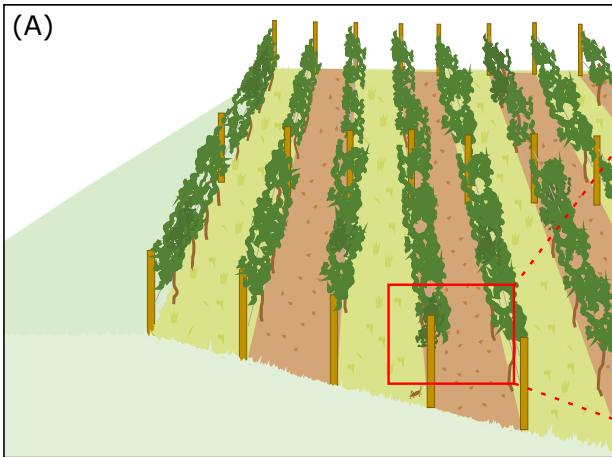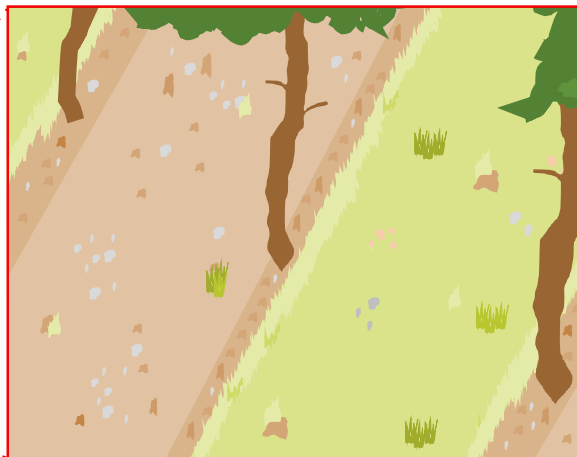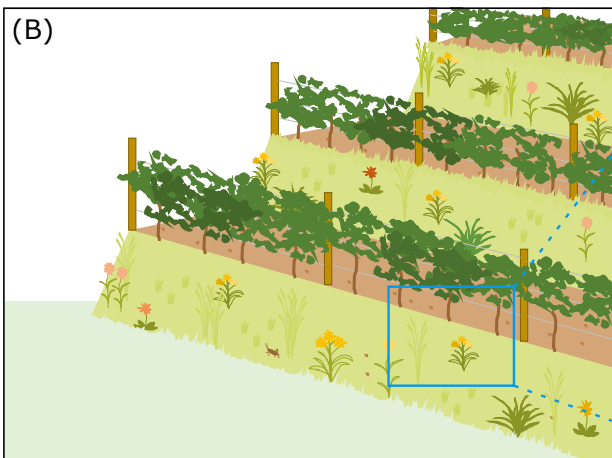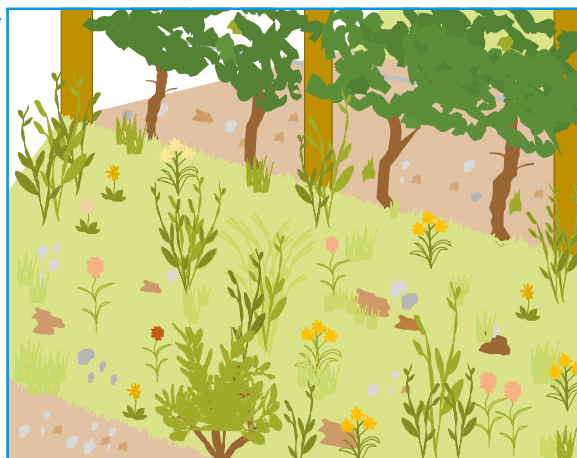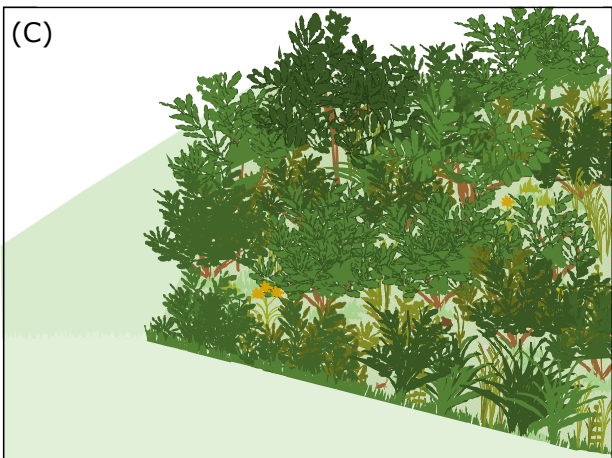

Supplement: s1 [file s1]
